# Supplementary material
Source: MDPI journal article supplement (https://www.mdpi.com/1999-4907/10/2/180)

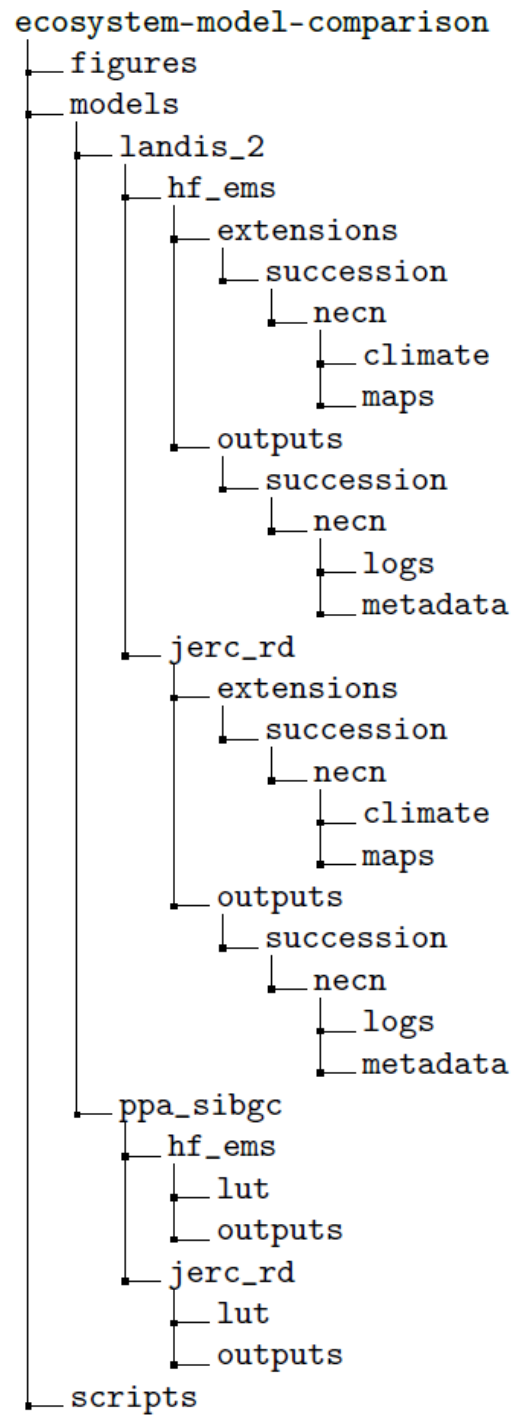

**Figure S1.** Directory structure of the GitHub repository.

Supplement: s1 [file s1]
